# Supplementary material for: Multiplexed shotgun genotyping for rapid and efficient genetic mapping
Source: HighWire-hosted journal article supplement (doi:10.1101/gr.115402.110), 2011-01-13
Supplement: msg-v0.1.tar.gz [file README.pdf › msg-v0.1/README.pdf]

## Installation

MSG currently runs on any linux platform.

Place `msg-version.tar.gz` in any directory:

```
$ tar xzf msg-version.tar.gz
$ cd msg_version/
$ make
```

Please ensure that the following dependencies are installed before running MSG (working versions are indicated in parentheses):

- Python (2.6)
- bwa (0.5.7)
- samtools (0.1.9-3)
- biopython-1.53
- Pyrex-0.9.9
- pysam-0.1.2 (apply fix\*)
- R packages (HiddenMarkov 1.3-1, zoo 1.6-2, R.methodsS3 1.2.0 and R.oo 1.7.3)

\*<http://code.google.com/p/pysam/issues/detail?id=22&can=1&q=dandavison0>

## Setting up the MSG analysis directory

1. Create a text file named `msg.cfg`. This file will specify the location of your data files, and a few other details. You can copy and fill-in the details in the sample `msg.cfg` file provided within your `msg` directory. All data files must be located within your MSG analysis directory (links to files are acceptable).

2. Format your barcode file as below:

| sp1   | sp2 | sp1_gen                        | sp2_gen                        | enzyme | pre-pd | linker_type | DeIQV | strict | minQV |  |  |  |  |
|-------|-----|--------------------------------|--------------------------------|--------|--------|-------------|-------|--------|-------|--|--|--|--|
| sim   | sec | dsim-all-chromosome-r1.3.fasta | dsec-all-chromosome-r1.3.fasta | MseI   | 1      | Dros_SR_vII | 0     | 0      | 0     |  |  |  |  |
| GATAG | B3  | Bcsec                          | male                           |        |        |             |       |        |       |  |  |  |  |
| CACCG | C12 | Bcsec                          | female                         |        |        |             |       |        |       |  |  |  |  |
| CTTAT | F10 | Bcsec                          | female                         |        |        |             |       |        |       |  |  |  |  |

3. Create a link to the `msg` software within your MSG analysis directory:  

```
$ ln -s path_to_msg msg
```
4. To run MSG, simply type the following from within your MSG analysis directory:  

```
$ perl msg/msgCluster.pl
```

## Sample data

Please download the following data:

### Data from manuscript

<http://trace.ncbi.nlm.nih.gov/Traces/home/>

- backcross data  
SRA025671.2/SRR071201.4
- parental Dsim\_w501  
SRA025671.2/SRR074287.1
- parental Dsec\_wsu1  
SRA025671.2/SRR074288.1

### Parental reference sequences

<ftp://ftp.flybase.net/genomes/>

- dsim-all-chromosome-r1.3.fasta.gz
- dsec-all-chromosome-r1.3.fasta.gz
